# Supplementary material for: Tumor-Derived Extracellular Vesicles Induce CCL18 Production by Mast Cells: A Possible Link to Angiogenesis
Source: MDPI journal article supplement (doi:10.3390/cells11030353), 2022-01-21
Supplement: s1 [file s1]

Table S1: List of upregulated genes in response to activation of LAD2 cells by A549-TMV (fold change, >1.5; P < 0.05.)

| Gene name    | Fold change | P-value   |
|--------------|-------------|-----------|
| WARS         | 4.81682     | 1.20E-123 |
| EGR1         | 4.747762    | 4.72E-23  |
| EGR3         | 3.672329    | 9.11E-16  |
| NR4A3        | 3.237475    | 1.34E-13  |
| KLHDC7B      | 3.140831    | 9.71E-13  |
| SLC7A11      | 2.844831    | 4.89E-11  |
| CCL4         | 2.829609    | 1.80E-10  |
| AC018413.1   | 2.679487    | 1.42E-09  |
| CCL18        | 2.596566    | 2.72E-20  |
| TRIB3        | 2.574964    | 9.31E-15  |
| SNHG7        | 2.55128     | 1.06E-49  |
| FOSB         | 2.534071    | 1.13E-08  |
| ATF4         | 2.528172    | 1.35E-86  |
| CCL4L2       | 2.519323    | 8.19E-09  |
| SELENOM      | 2.489205    | 2.97E-14  |
| EPB41L4A-AS1 | 2.458576    | 2.67E-22  |
| MAP1LC3A     | 2.447241    | 2.76E-12  |
| LINC02365    | 2.44588     | 3.59E-16  |
| ZNF581       | 2.435573    | 3.20E-16  |
| CCL3L1       | 2.433458    | 3.20E-08  |
| PCDHB15      | 2.395269    | 2.31E-08  |
| DDIT3        | 2.369201    | 3.48E-16  |
| EGR2         | 2.356106    | 5.40E-08  |
| HIST3H2A     | 2.344537    | 6.51E-31  |
| CFAP70       | 2.328838    | 2.07E-07  |
| GARS         | 2.327175    | 2.56E-42  |
| RGS20        | 2.323101    | 1.50E-07  |
| CCPG1        | 2.284361    | 6.68E-17  |
| BIRC3        | 2.258823    | 9.97E-11  |
| ATF3         | 2.225794    | 4.19E-07  |
| C6orf48      | 2.219108    | 1.12E-42  |
| FCRLA        | 2.210092    | 3.09E-07  |
| PSAT1        | 2.18568     | 1.42E-06  |
| C5orf47      | 2.183919    | 1.30E-12  |
| DAAM1        | 2.180419    | 3.59E-09  |
| SLC3A2       | 2.175255    | 4.18E-18  |
| LINC01873    | 2.168777    | 9.62E-12  |
| AKAP5        | 2.168704    | 1.64E-08  |
| CADM1        | 2.130143    | 9.89E-13  |
| TMEM45A      | 2.113973    | 3.19E-07  |
| BEX2         | 2.099039    | 3.14E-31  |
| AC087473.1   | 2.096212    | 4.26E-13  |
| AC131649.2   | 2.084935    | 2.68E-07  |
| RASEF        | 2.079836    | 1.01E-06  |

|                    |          |             |
|--------------------|----------|-------------|
| <b>XPOT</b>        | 2.074602 | 5.73E-14    |
| <b>CCDC18-AS1</b>  | 2.071087 | 9.08E-14    |
| <b>PLIN2</b>       | 2.051607 | 4.49E-28    |
| <b>RSL24D1</b>     | 2.043412 | 8.91E-29    |
| <b>BMP7</b>        | 2.012223 | 9.57E-09    |
| <b>AC006548.3</b>  | 2.006746 | 2.50E-10    |
| <b>CCL3</b>        | 2.00189  | 4.79E-06    |
| <b>PRNP</b>        | 2.001033 | 4.99E-06    |
| <b>IER3</b>        | 1.992283 | 5.24E-09    |
| <b>PCK2</b>        | 1.985291 | 4.53E-07    |
| <b>YPEL4</b>       | 1.982208 | 2.57E-05    |
| <b>GAS5</b>        | 1.979888 | 2.04E-27    |
| <b>CTSF</b>        | 1.97523  | 3.57E-10    |
| <b>EVI2A</b>       | 1.972849 | 5.87E-23    |
| <b>CEBPB</b>       | 1.971092 | 1.02E-21    |
| <b>MTHFD2</b>      | 1.954214 | 1.12E-28    |
| <b>LRRC75A</b>     | 1.953826 | 1.39E-07    |
| <b>CA5A</b>        | 1.936203 | 3.53E-11    |
| <b>SPACA3</b>      | 1.933486 | 3.54E-05    |
| <b>TNFRSF12A</b>   | 1.932322 | 2.18E-06    |
| <b>RASGEF1B</b>    | 1.926406 | 7.75E-06    |
| <b>PTGS2</b>       | 1.919871 | 5.47E-05    |
| <b>AC093627.4</b>  | 1.919831 | 5.82E-05    |
| <b>UBXN1</b>       | 1.913741 | 1.32E-27    |
| <b>SNHG8</b>       | 1.913723 | 1.02E-18    |
| <b>LY96</b>        | 1.912752 | 4.87E-05    |
| <b>LRRC75A-AS1</b> | 1.899769 | 5.17E-12    |
| <b>TNF</b>         | 1.899733 | 6.20E-06    |
| <b>SPP1</b>        | 1.895489 | 2.12E-05    |
| <b>SARS</b>        | 1.894817 | 1.22E-32    |
| <b>BFSP1</b>       | 1.885954 | 9.34E-05    |
| <b>CRISPLD1</b>    | 1.88539  | 6.24E-05    |
| <b>AC021242.3</b>  | 1.879448 | 0.000107096 |
| <b>AC068448.1</b>  | 1.876629 | 5.81E-05    |
| <b>CSNK2A2</b>     | 1.872943 | 6.55E-18    |
| <b>GPR34</b>       | 1.867772 | 4.82E-13    |
| <b>DUSP4</b>       | 1.865189 | 2.28E-19    |
| <b>Z99755.3</b>    | 1.864255 | 6.75E-13    |
| <b>HS3ST2</b>      | 1.862199 | 7.77E-12    |
| <b>AC099550.1</b>  | 1.860596 | 1.03E-05    |
| <b>AC005632.4</b>  | 1.857766 | 1.05E-06    |
| <b>AC074349.1</b>  | 1.8557   | 3.30E-10    |
| <b>XIRP1</b>       | 1.851535 | 7.82E-06    |
| <b>SPRY2</b>       | 1.833385 | 0.000179215 |
| <b>LINC00506</b>   | 1.828317 | 0.000187719 |
| <b>PIGN</b>        | 1.827877 | 1.37E-07    |
| <b>MIPOL1</b>      | 1.821275 | 6.35E-07    |
| <b>DPH5</b>        | 1.8166   | 1.92E-15    |

|                    |          |             |
|--------------------|----------|-------------|
| <b>GZMB</b>        | 1.816203 | 6.91E-06    |
| <b>KCNQ1OT1</b>    | 1.810482 | 2.81E-07    |
| <b>FOS</b>         | 1.807978 | 9.63E-05    |
| <b>TNFRSF4</b>     | 1.80637  | 0.000110389 |
| <b>SLC7A1</b>      | 1.799737 | 1.37E-07    |
| <b>LINC00504</b>   | 1.793325 | 6.53E-29    |
| <b>UGDH-AS1</b>    | 1.793181 | 0.000163715 |
| <b>BIRC7</b>       | 1.792677 | 8.82E-12    |
| <b>TCTEX1D2</b>    | 1.791659 | 0.00033216  |
| <b>IRS2</b>        | 1.79098  | 3.01E-07    |
| <b>IGBP1</b>       | 1.790358 | 1.35E-20    |
| <b>PHLDA1</b>      | 1.784328 | 0.000380915 |
| <b>BBC3</b>        | 1.784262 | 1.50E-11    |
| <b>C4orf32</b>     | 1.782558 | 1.49E-05    |
| <b>ZFAS1</b>       | 1.78109  | 4.29E-13    |
| <b>TBC1D8B</b>     | 1.779953 | 1.93E-07    |
| <b>AC019322.4</b>  | 1.779861 | 3.62E-06    |
| <b>AL356056.1</b>  | 1.776183 | 1.09E-06    |
| <b>EIF1</b>        | 1.775985 | 2.59E-30    |
| <b>GBP2</b>        | 1.773753 | 1.47E-05    |
| <b>IL18</b>        | 1.756892 | 7.87E-21    |
| <b>KLHL24</b>      | 1.747089 | 2.89E-09    |
| <b>AC007333.2</b>  | 1.745276 | 0.00022248  |
| <b>HMP19</b>       | 1.74261  | 0.000534821 |
| <b>AL954642.1</b>  | 1.741974 | 0.000614701 |
| <b>MARS</b>        | 1.741904 | 1.28E-17    |
| <b>AC093525.6</b>  | 1.739609 | 0.000461334 |
| <b>AC025048.2</b>  | 1.739124 | 0.000376408 |
| <b>IARS</b>        | 1.737063 | 3.13E-09    |
| <b>SORBS3</b>      | 1.735059 | 8.25E-07    |
| <b>AC044836.1</b>  | 1.727091 | 0.000789641 |
| <b>AC025741.1</b>  | 1.725808 | 0.000734384 |
| <b>LYRM9</b>       | 1.724622 | 0.000447327 |
| <b>AC091825.1</b>  | 1.722677 | 0.000789987 |
| <b>AC108134.3</b>  | 1.722638 | 2.78E-09    |
| <b>GPR146</b>      | 1.722554 | 0.000805336 |
| <b>MTURN</b>       | 1.715784 | 7.63E-08    |
| <b>AC091544.5</b>  | 1.713536 | 0.000658952 |
| <b>TDRD3</b>       | 1.711926 | 1.20E-27    |
| <b>SEMA6A</b>      | 1.711802 | 0.000540738 |
| <b>GABARAPL1</b>   | 1.703206 | 0.000338287 |
| <b>LINC00173</b>   | 1.701922 | 5.95E-05    |
| <b>ZNF528-AS1</b>  | 1.7004   | 0.000388777 |
| <b>RUNDC3A-AS1</b> | 1.698274 | 0.000208772 |
| <b>AC026904.2</b>  | 1.697644 | 1.61E-05    |
| <b>HCG20</b>       | 1.693653 | 0.0007683   |
| <b>AC245140.2</b>  | 1.693512 | 0.001221671 |
| <b>RBM43</b>       | 1.693018 | 6.79E-05    |

|                   |          |             |
|-------------------|----------|-------------|
| <b>HOMER3</b>     | 1.692832 | 0.000171049 |
| <b>CAPN10-AS1</b> | 1.692357 | 0.001120272 |
| <b>NXPH4</b>      | 1.690915 | 0.000567614 |
| <b>TRIB1</b>      | 1.687507 | 0.00110435  |
| <b>MIATNB</b>     | 1.686542 | 0.001329504 |
| <b>SPP2</b>       | 1.681657 | 0.00137178  |
| <b>CNIH3</b>      | 1.680122 | 4.63E-05    |
| <b>PCDHB9</b>     | 1.678873 | 0.000702661 |
| <b>SAT2</b>       | 1.674606 | 1.89E-07    |
| <b>AL139246.6</b> | 1.672904 | 0.000537993 |
| <b>ZNF540</b>     | 1.672388 | 4.12E-06    |
| <b>BSN</b>        | 1.672063 | 0.001584279 |
| <b>FFAR1</b>      | 1.668103 | 0.001113593 |
| <b>LINC00920</b>  | 1.666199 | 0.000908172 |
| <b>NBR2</b>       | 1.660286 | 7.60E-05    |
| <b>ITGBL1</b>     | 1.660027 | 2.65E-09    |
| <b>HERPUD1</b>    | 1.657013 | 2.42E-20    |
| <b>SAT1</b>       | 1.656564 | 8.04E-31    |
| <b>APOC1</b>      | 1.655728 | 0.000238485 |
| <b>GATA3</b>      | 1.654542 | 0.001675138 |
| <b>LINC01146</b>  | 1.653358 | 0.001525844 |
| <b>ROR1-AS1</b>   | 1.649819 | 0.001237154 |
| <b>STAMBPL1</b>   | 1.649736 | 0.000427919 |
| <b>ADM2</b>       | 1.647096 | 0.00111239  |
| <b>TAF1D</b>      | 1.645023 | 8.32E-12    |
| <b>CREM</b>       | 1.644161 | 0.002294443 |
| <b>NR2F2-AS1</b>  | 1.642349 | 0.001971267 |
| <b>EIF3G</b>      | 1.642036 | 1.78E-11    |
| <b>AL117378.1</b> | 1.641118 | 0.001836444 |
| <b>AC004988.1</b> | 1.638693 | 8.50E-09    |
| <b>GDF15</b>      | 1.638668 | 1.15E-25    |
| <b>AP000432.2</b> | 1.638402 | 0.000132306 |
| <b>AC144831.1</b> | 1.63633  | 0.001936612 |
| <b>AC016831.5</b> | 1.635728 | 0.00240484  |
| <b>AL118516.1</b> | 1.634437 | 0.000137551 |
| <b>NINJ1</b>      | 1.6311   | 0.000184087 |
| <b>PPY</b>        | 1.629709 | 1.38E-07    |
| <b>LRRK1</b>      | 1.629124 | 0.001167979 |
| <b>AL355377.2</b> | 1.628531 | 5.28E-06    |
| <b>XBP1</b>       | 1.628117 | 4.37E-06    |
| <b>LY6G5C</b>     | 1.624458 | 0.001316233 |
| <b>EIF3E</b>      | 1.624277 | 3.97E-25    |
| <b>RAB39B</b>     | 1.623393 | 0.000360317 |
| <b>FOXO1</b>      | 1.622876 | 0.001479682 |
| <b>EMP2</b>       | 1.621872 | 0.002547126 |
| <b>NTNG2</b>      | 1.621755 | 0.002241194 |
| <b>ZNF277</b>     | 1.619849 | 2.30E-05    |
| <b>CTTN</b>       | 1.619746 | 0.00242586  |

|            |          |             |
|------------|----------|-------------|
| AP001160.4 | 1.617124 | 0.002037834 |
| FYN        | 1.615315 | 0.002992844 |
| NFKBIL1    | 1.61283  | 0.000446492 |
| LGALS3     | 1.612285 | 1.54E-18    |
| LINC01967  | 1.612237 | 0.003219437 |
| CASQ1      | 1.612148 | 2.42E-07    |
| SHMT2      | 1.610779 | 1.97E-09    |
| EIF4EBP1   | 1.60882  | 2.65E-11    |
| ENTHD1     | 1.608042 | 2.49E-17    |
| NFKBID     | 1.607658 | 0.000174618 |
| CCDC122    | 1.607364 | 0.003500834 |
| CD69       | 1.606962 | 7.68E-05    |
| SDAD1P1    | 1.606667 | 0.003509511 |
| TMEM212    | 1.601863 | 0.000502023 |
| FAR2P4     | 1.600332 | 6.96E-05    |
| NEGR1      | 1.598378 | 0.003679822 |
| CDKN1B     | 1.598329 | 9.69E-05    |
| KIAA1217   | 1.594955 | 0.000826939 |
| AC107958.2 | 1.594209 | 0.004163467 |
| MAFF       | 1.591601 | 0.002132146 |
| ZNF442     | 1.589255 | 0.004025004 |
| BCAS4      | 1.589208 | 0.003542943 |
| Z95114.4   | 1.589135 | 0.004468202 |
| TUBE1      | 1.58905  | 0.000866045 |
| ZNF667-AS1 | 1.588773 | 2.01E-06    |
| TXLNB      | 1.588616 | 0.002198823 |
| RPS4Y1     | 1.586131 | 3.90E-15    |
| PITPNA-AS1 | 1.585739 | 0.000871793 |
| RAB2B      | 1.583105 | 3.74E-13    |
| HSD17B11   | 1.582851 | 2.40E-16    |
| RALGPS2    | 1.581455 | 3.71E-05    |
| AC074183.2 | 1.581425 | 0.003676371 |
| EIF2S3     | 1.578331 | 1.60E-09    |
| FABP5      | 1.576252 | 0.004156498 |
| SNX18      | 1.575794 | 0.002698382 |
| ANK2       | 1.57554  | 0.002866006 |
| LINC01918  | 1.575508 | 1.75E-08    |
| TFPI       | 1.574598 | 0.003929292 |
| HELLPAR    | 1.573158 | 3.25E-07    |
| CREB3L3    | 1.573129 | 0.000595719 |
| CPB2-AS1   | 1.572856 | 0.004504779 |
| PIM3       | 1.572574 | 4.58E-07    |
| ZFAND1     | 1.57226  | 1.14E-05    |
| UBXN11     | 1.571754 | 8.47E-05    |
| LINC00520  | 1.570828 | 2.00E-11    |
| ANKRD42    | 1.570133 | 0.000353509 |
| AC147067.1 | 1.569705 | 0.000586265 |
| AC027279.1 | 1.568423 | 0.00387749  |

|                   |          |             |
|-------------------|----------|-------------|
| <b>SPTLC3</b>     | 1.5679   | 0.005251628 |
| <b>VIM</b>        | 1.566391 | 3.45E-13    |
| <b>BCL11A</b>     | 1.566225 | 0.005878811 |
| <b>AC092119.2</b> | 1.565452 | 0.004154722 |
| <b>S100Z</b>      | 1.564192 | 0.000229983 |
| <b>UCKL1-AS1</b>  | 1.563222 | 0.006101389 |
| <b>APOL2</b>      | 1.562939 | 0.003376997 |
| <b>AC121333.1</b> | 1.562688 | 0.006000649 |
| <b>TIMM9</b>      | 1.5626   | 2.95E-05    |
| <b>TMEM182</b>    | 1.561024 | 0.004093834 |
| <b>NEDD4</b>      | 1.560643 | 0.004686409 |
| <b>TXNIP</b>      | 1.559466 | 7.64E-12    |
| <b>H1F0</b>       | 1.558846 | 9.15E-14    |
| <b>LINC01481</b>  | 1.557685 | 0.001863174 |
| <b>AC015883.1</b> | 1.555972 | 0.006628914 |
| <b>NPY2R</b>      | 1.55567  | 0.000361133 |
| <b>CYB561D2</b>   | 1.555436 | 0.006467591 |
| <b>SNHG19</b>     | 1.554631 | 0.000193573 |
| <b>C11orf1</b>    | 1.554267 | 1.11E-08    |
| <b>AZU1</b>       | 1.553899 | 0.001065636 |
| <b>NDFIP2</b>     | 1.552935 | 7.10E-05    |
| <b>LINC01023</b>  | 1.551481 | 0.000219413 |
| <b>BCAS1</b>      | 1.551131 | 0.006988641 |
| <b>ATXN3</b>      | 1.550259 | 1.30E-08    |
| <b>SRP14-AS1</b>  | 1.548291 | 0.004376626 |
| <b>AC083862.2</b> | 1.548111 | 0.005264277 |
| <b>ISCU</b>       | 1.547278 | 1.73E-12    |
| <b>DALRD3</b>     | 1.545288 | 1.16E-06    |
| <b>AL591441.1</b> | 1.544613 | 0.006118683 |
| <b>NCOA7</b>      | 1.544155 | 1.91E-05    |
| <b>OSBPL6</b>     | 1.542868 | 0.005575635 |
| <b>AL022311.1</b> | 1.542831 | 0.000224502 |
| <b>KRBOX4</b>     | 1.541595 | 0.001276785 |
| <b>AC104662.3</b> | 1.541308 | 0.000612139 |
| <b>CALCOCO1</b>   | 1.541255 | 3.63E-07    |
| <b>SNHG12</b>     | 1.540664 | 2.63E-05    |
| <b>NEAT1</b>      | 1.540653 | 2.15E-07    |
| <b>HIST2H2BE</b>  | 1.539978 | 0.001630416 |
| <b>NAB2</b>       | 1.539752 | 0.000569845 |
| <b>NATD1</b>      | 1.539553 | 0.007921278 |
| <b>JMY</b>        | 1.53916  | 0.008135075 |
| <b>RPL5</b>       | 1.537645 | 1.71E-20    |
| <b>AC118344.2</b> | 1.537632 | 0.003058323 |
| <b>MPV17L</b>     | 1.536985 | 1.00E-05    |
| <b>CSMD1</b>      | 1.536782 | 0.005588594 |
| <b>NR4A2</b>      | 1.535989 | 0.005283919 |
| <b>LETMD1</b>     | 1.535525 | 1.06E-05    |
| <b>AC008074.3</b> | 1.533648 | 0.008053532 |

|             |          |             |
|-------------|----------|-------------|
| TPT1-AS1    | 1.533015 | 0.000865021 |
| SSC5D       | 1.532679 | 0.005337686 |
| CD22        | 1.532189 | 7.04E-14    |
| DNM1P35     | 1.531087 | 0.001362189 |
| LOH12CR2    | 1.531029 | 0.005123265 |
| ACSL1       | 1.530405 | 0.000503658 |
| SRGAP1      | 1.529715 | 0.000105406 |
| AC008079.2  | 1.52887  | 0.005841635 |
| AC020916.1  | 1.528059 | 0.006407453 |
| CREBRF      | 1.526617 | 1.51E-09    |
| FMNL2       | 1.525467 | 0.006351447 |
| SLC2A11     | 1.524341 | 1.31E-06    |
| Z95114.1    | 1.524236 | 0.002814622 |
| P3H1        | 1.522736 | 0.004871039 |
| ELP2        | 1.522164 | 0.000445534 |
| ZNF471      | 1.522128 | 0.003804882 |
| ZNF331      | 1.521475 | 0.001236185 |
| LINC00900   | 1.521474 | 0.000644537 |
| NPM1        | 1.521333 | 2.33E-12    |
| LINC00694   | 1.519657 | 0.002761386 |
| LINC00672   | 1.518487 | 0.00816387  |
| RAB11FIP1   | 1.518403 | 4.04E-05    |
| EN2         | 1.518287 | 0.007421717 |
| YARS        | 1.51774  | 7.55E-09    |
| RILPL1      | 1.516226 | 0.000140891 |
| HIC1        | 1.515921 | 0.006119431 |
| GIN1        | 1.515286 | 0.003865018 |
| ZNF677      | 1.515112 | 0.006024959 |
| DNAH1       | 1.515104 | 0.005538778 |
| IL1B        | 1.513992 | 0.00104329  |
| KLF10       | 1.513889 | 0.001435195 |
| AC092068.3  | 1.513473 | 0.007737754 |
| CD55        | 1.512531 | 1.78E-07    |
| TM4SF19-AS1 | 1.512257 | 0.007352596 |
| LINC02099   | 1.510545 | 2.40E-05    |
| CHMP1B      | 1.51026  | 5.51E-06    |
| ERP29       | 1.509261 | 8.95E-11    |
| RPS6KL1     | 1.509132 | 0.006115793 |
| AC022400.7  | 1.508968 | 4.16E-06    |
| PIGP        | 1.508635 | 0.000374513 |
| COL28A1     | 1.505352 | 0.008463562 |
| XIAP        | 1.505122 | 5.22E-09    |
| AL672032.1  | 1.501879 | 0.006551822 |
| ARHGAP12    | 1.501098 | 0.00812918  |
| SESN2       | 1.500479 | 0.000117007 |
