# Supplementary material for: Tumor-Derived Extracellular Vesicles Induce CCL18 Production by Mast Cells: A Possible Link to Angiogenesis
Source: MDPI journal article supplement (doi:10.3390/cells11030353), 2022-01-21
Supplement: s1 [file s1]

Table S2: List of downregulated genes in response to activation of LAD2 cells by A549-TMV (fold change, >-2; P < 0.05.)

| Gene name | Fold change | P-value   |
|-----------|-------------|-----------|
| TK1       | -8.45245    | 1.10E-87  |
| MKI67     | -8.24437    | 1.89E-113 |
| TOP2A     | -7.29947    | 2.13E-120 |
| RRM2      | -7.2316     | 3.28E-58  |
| TYMS      | -6.374      | 7.67E-112 |
| PRC1      | -6.25551    | 9.18E-83  |
| TROAP     | -6.07192    | 6.58E-52  |
| BUB1B     | -6.05145    | 3.13E-53  |
| PCLAF     | -6.04503    | 3.23E-82  |
| DHFR      | -6.00633    | 7.24E-88  |
| ASF1B     | -5.97451    | 1.71E-116 |
| ZWINT     | -5.95396    | 7.31E-50  |
| CDK1      | -5.81778    | 6.27E-63  |
| NUSAP1    | -5.7288     | 3.31E-58  |
| DERL3     | -5.68691    | 3.16E-44  |
| GTSE1     | -5.58355    | 1.57E-34  |
| SKA1      | -5.3577     | 3.31E-43  |
| KIFC1     | -5.31479    | 3.48E-47  |
| UBE2C     | -5.31132    | 2.56E-69  |
| NCAPG2    | -5.30366    | 1.94E-35  |
| ESPL1     | -5.18793    | 6.57E-30  |
| CENPF     | -5.18401    | 1.65E-58  |
| CENPM     | -5.1498     | 2.43E-37  |
| CDCA5     | -5.14721    | 8.47E-29  |
| ZNF367    | -5.1122     | 2.16E-30  |
| CCNA2     | -5.10357    | 1.19E-56  |
| E2F1      | -5.0998     | 1.49E-43  |
| TMEM97    | -5.04279    | 1.48E-81  |
| CEP55     | -5.01077    | 6.94E-36  |
| CDKN3     | -5.00966    | 1.36E-40  |
| TPX2      | -5.00231    | 1.16E-35  |
| HMMR      | -4.99963    | 4.77E-41  |
| BUB1      | -4.89036    | 8.83E-31  |
| FEN1      | -4.83472    | 4.52E-72  |
| NDC80     | -4.79878    | 3.31E-31  |
| RAD51AP1  | -4.79167    | 1.60E-28  |
| PBK       | -4.75663    | 1.03E-30  |
| ESCO2     | -4.75359    | 6.27E-31  |
| CCNB1     | -4.72447    | 6.37E-52  |
| MELK      | -4.69593    | 1.10E-26  |
| AURKA     | -4.6321     | 8.94E-37  |
| PIMREG    | -4.62143    | 3.06E-27  |
| ASPM      | -4.57793    | 5.10E-32  |
| PKMYT1    | -4.56919    | 3.37E-40  |

|            |          |          |
|------------|----------|----------|
| SPC25      | -4.51849 | 8.90E-32 |
| CDCA3      | -4.51377 | 3.82E-24 |
| KIF23      | -4.44673 | 2.04E-25 |
| CDC6       | -4.41259 | 5.94E-25 |
| GGH        | -4.39656 | 2.78E-62 |
| CDCA8      | -4.38675 | 5.13E-32 |
| NUF2       | -4.36007 | 1.25E-35 |
| NCAPG      | -4.33852 | 8.10E-27 |
| PRR11      | -4.30153 | 1.84E-48 |
| MCM5       | -4.26704 | 7.85E-51 |
| HELLS      | -4.22062 | 2.47E-32 |
| CENPK      | -4.21386 | 1.04E-42 |
| RFC3       | -4.20748 | 3.01E-44 |
| CENPW      | -4.08753 | 8.20E-26 |
| SHCBP1     | -4.07597 | 6.62E-39 |
| MCM7       | -4.03061 | 1.05E-85 |
| BIRC5      | -3.92396 | 6.04E-26 |
| GINS2      | -3.89752 | 1.04E-27 |
| TCF19      | -3.88305 | 2.05E-21 |
| KIF4A      | -3.86639 | 8.80E-22 |
| AL109918.1 | -3.86337 | 4.63E-18 |
| FANCA      | -3.85518 | 5.12E-19 |
| KNL1       | -3.84755 | 2.35E-20 |
| KIF18A     | -3.83272 | 3.24E-20 |
| PLK4       | -3.79173 | 2.17E-20 |
| FBXO5      | -3.78291 | 5.33E-24 |
| OIP5       | -3.7804  | 1.05E-18 |
| RAD51      | -3.77255 | 2.12E-21 |
| MAD2L1     | -3.74654 | 1.74E-34 |
| CDC45      | -3.71273 | 2.30E-18 |
| DSCC1      | -3.71156 | 4.04E-19 |
| ATAD2      | -3.70434 | 2.55E-28 |
| ARHGAP11A  | -3.70117 | 2.81E-22 |
| TUBA1B     | -3.69597 | 1.40E-93 |
| CDC25A     | -3.68154 | 7.73E-17 |
| CCNB2      | -3.67444 | 3.44E-29 |
| MCM10      | -3.65744 | 1.26E-18 |
| HJURP      | -3.62821 | 5.49E-21 |
| CIT        | -3.62389 | 1.88E-18 |
| MYBL2      | -3.61864 | 6.82E-17 |
| ANLN       | -3.60746 | 7.04E-16 |
| CENPA      | -3.60496 | 4.12E-18 |
| SGO1       | -3.59817 | 2.65E-21 |
| CHEK1      | -3.58823 | 1.85E-25 |
| TRIP13     | -3.56361 | 1.60E-23 |
| MCM4       | -3.54755 | 1.80E-26 |
| FANCI      | -3.53919 | 2.06E-16 |
| PLK1       | -3.53361 | 1.30E-40 |

|                 |          |          |
|-----------------|----------|----------|
| <b>CCDC34</b>   | -3.51217 | 5.84E-17 |
| <b>SKA3</b>     | -3.50064 | 2.23E-16 |
| <b>CKAP2L</b>   | -3.4874  | 5.49E-26 |
| <b>CHAF1A</b>   | -3.4716  | 2.10E-21 |
| <b>HIST1H4C</b> | -3.4464  | 1.11E-22 |
| <b>CKAP2</b>    | -3.41391 | 3.34E-33 |
| <b>UHRF1</b>    | -3.401   | 2.77E-14 |
| <b>CCNE2</b>    | -3.37131 | 1.57E-18 |
| <b>FASN</b>     | -3.36699 | 2.77E-30 |
| <b>PTTG1</b>    | -3.35002 | 2.34E-40 |
| <b>KIF2C</b>    | -3.32026 | 1.43E-16 |
| <b>SPC24</b>    | -3.30877 | 3.76E-14 |
| <b>ACAT2</b>    | -3.30548 | 1.08E-73 |
| <b>RACGAP1</b>  | -3.29303 | 1.46E-24 |
| <b>FOXM1</b>    | -3.28701 | 6.33E-17 |
| <b>NCAPH</b>    | -3.28433 | 2.28E-15 |
| <b>RAD54B</b>   | -3.25717 | 4.00E-14 |
| <b>H2AFX</b>    | -3.23173 | 4.10E-31 |
| <b>KIF15</b>    | -3.21799 | 6.84E-13 |
| <b>MCM8</b>     | -3.2168  | 3.26E-23 |
| <b>GINS1</b>    | -3.20839 | 1.19E-16 |
| <b>ORC6</b>     | -3.2024  | 2.39E-30 |
| <b>CENPU</b>    | -3.19185 | 4.22E-19 |
| <b>SPAG5</b>    | -3.17759 | 3.25E-15 |
| <b>MCM2</b>     | -3.16948 | 4.48E-36 |
| <b>TACC3</b>    | -3.16197 | 1.47E-26 |
| <b>SMC4</b>     | -3.14112 | 9.68E-41 |
| <b>STMN1</b>    | -3.13129 | 1.56E-54 |
| <b>CKS1B</b>    | -3.11731 | 4.18E-46 |
| <b>CENPE</b>    | -3.0993  | 6.67E-15 |
| <b>KIF11</b>    | -3.0952  | 4.65E-19 |
| <b>CDK2</b>     | -3.09292 | 1.24E-15 |
| <b>RECQL4</b>   | -3.09079 | 2.24E-14 |
| <b>PSMC3IP</b>  | -3.0876  | 1.64E-13 |
| <b>FDPS</b>     | -3.0824  | 7.38E-79 |
| <b>CDKN2C</b>   | -3.02892 | 6.20E-32 |
| <b>ATAD5</b>    | -3.02513 | 2.86E-13 |
| <b>NEURL1B</b>  | -3.01682 | 1.23E-11 |
| <b>CLSPN</b>    | -2.99189 | 4.40E-16 |
| <b>WDR76</b>    | -2.98172 | 2.69E-12 |
| <b>DDIAS</b>    | -2.96239 | 4.72E-12 |
| <b>SAPCD2</b>   | -2.95908 | 1.97E-15 |
| <b>UNG</b>      | -2.95511 | 2.32E-21 |
| <b>BRCA1</b>    | -2.94454 | 2.28E-24 |
| <b>PCNA</b>     | -2.9327  | 5.78E-35 |
| <b>RFC4</b>     | -2.93121 | 2.25E-22 |
| <b>UBE2T</b>    | -2.91879 | 1.56E-20 |
| <b>MXD3</b>     | -2.88952 | 2.88E-14 |

|                 |          |          |
|-----------------|----------|----------|
| <b>POLD1</b>    | -2.88928 | 6.24E-13 |
| <b>MCM3</b>     | -2.88371 | 1.75E-30 |
| <b>E2F2</b>     | -2.86331 | 2.10E-11 |
| <b>HMGB2</b>    | -2.85602 | 5.55E-29 |
| <b>LIG1</b>     | -2.84094 | 4.15E-17 |
| <b>TTK</b>      | -2.83784 | 2.64E-14 |
| <b>TMEM106C</b> | -2.81356 | 1.71E-24 |
| <b>EZH2</b>     | -2.81279 | 5.65E-19 |
| <b>KIF14</b>    | -2.80914 | 3.88E-14 |
| <b>C21orf58</b> | -2.79132 | 1.10E-11 |
| <b>POLE2</b>    | -2.78943 | 1.21E-10 |
| <b>KIAA1524</b> | -2.78779 | 1.18E-10 |
| <b>SAC3D1</b>   | -2.76446 | 2.62E-21 |
| <b>DDX11</b>    | -2.75253 | 4.07E-16 |
| <b>FAM111B</b>  | -2.75069 | 3.68E-10 |
| <b>CDCA2</b>    | -2.70565 | 9.63E-10 |
| <b>DSN1</b>     | -2.7011  | 8.16E-14 |
| <b>SPDL1</b>    | -2.69819 | 7.62E-12 |
| <b>C4orf46</b>  | -2.69458 | 1.57E-11 |
| <b>RMI2</b>     | -2.69357 | 3.91E-14 |
| <b>HMGCS1</b>   | -2.6912  | 1.85E-81 |
| <b>NUDT8</b>    | -2.68997 | 2.51E-11 |
| <b>PSRC1</b>    | -2.68935 | 2.77E-10 |
| <b>MASTL</b>    | -2.66703 | 6.02E-11 |
| <b>NEK2</b>     | -2.64429 | 1.69E-11 |
| <b>NCAPD2</b>   | -2.63608 | 1.31E-19 |
| <b>RRM1</b>     | -2.62975 | 7.71E-24 |
| <b>FAM83D</b>   | -2.6203  | 2.23E-09 |
| <b>DTL</b>      | -2.61082 | 3.81E-10 |
| <b>LSS</b>      | -2.59763 | 7.01E-22 |
| <b>WEE1</b>     | -2.58537 | 9.84E-16 |
| <b>STIL</b>     | -2.57806 | 8.39E-12 |
| <b>MIS18A</b>   | -2.56308 | 5.65E-13 |
| <b>DIAPH3</b>   | -2.55395 | 5.32E-09 |
| <b>TUBB4B</b>   | -2.53006 | 1.54E-50 |
| <b>KIF20B</b>   | -2.51961 | 4.57E-14 |
| <b>TUBB</b>     | -2.5105  | 2.41E-37 |
| <b>BCL2L12</b>  | -2.50658 | 5.56E-21 |
| <b>DNMT1</b>    | -2.49922 | 1.60E-23 |
| <b>RAD54L</b>   | -2.47935 | 1.88E-08 |
| <b>NRM</b>      | -2.47716 | 3.35E-13 |
| <b>TM7SF2</b>   | -2.47646 | 1.03E-14 |
| <b>SMC2</b>     | -2.47017 | 2.41E-23 |
| <b>CDT1</b>     | -2.46659 | 3.61E-13 |
| <b>AURKB</b>    | -2.45746 | 8.47E-12 |
| <b>POLA2</b>    | -2.45665 | 5.52E-10 |
| <b>POLA1</b>    | -2.45561 | 3.18E-09 |
| <b>TUBA1C</b>   | -2.43857 | 4.18E-44 |

|          |          |          |
|----------|----------|----------|
| TEX30    | -2.42791 | 4.02E-14 |
| POLQ     | -2.42146 | 1.59E-08 |
| CCNF     | -2.42034 | 9.38E-10 |
| DLGAP5   | -2.41868 | 6.04E-08 |
| CTPS1    | -2.40706 | 4.96E-08 |
| FIGNL1   | -2.40683 | 2.34E-09 |
| EXO1     | -2.40488 | 7.36E-08 |
| DTYMK    | -2.40089 | 2.33E-15 |
| CDCA7    | -2.399   | 1.58E-11 |
| NET1     | -2.39686 | 2.81E-09 |
| MND1     | -2.39274 | 4.03E-08 |
| BLM      | -2.36339 | 6.09E-10 |
| NUDT15   | -2.36041 | 4.86E-11 |
| PHF19    | -2.3514  | 8.87E-11 |
| CENPO    | -2.34902 | 5.90E-08 |
| CSE1L    | -2.34014 | 4.24E-18 |
| NDC1     | -2.32819 | 6.40E-13 |
| AACS     | -2.32336 | 5.01E-16 |
| MCM6     | -2.31722 | 3.26E-11 |
| CDC20    | -2.30541 | 1.79E-08 |
| SLF1     | -2.29843 | 3.09E-09 |
| TIMELESS | -2.29333 | 1.27E-14 |
| KIF18B   | -2.28394 | 3.95E-07 |
| KNSTRN   | -2.28337 | 4.98E-12 |
| DHCR7    | -2.28335 | 2.24E-22 |
| RMI1     | -2.26531 | 7.12E-25 |
| EBP      | -2.25558 | 1.45E-46 |
| RBL1     | -2.24857 | 6.50E-09 |
| RDM1     | -2.24086 | 6.35E-07 |
| GMNN     | -2.23602 | 1.68E-12 |
| C16orf59 | -2.22633 | 8.35E-07 |
| EMC3-AS1 | -2.22358 | 3.54E-07 |
| TUBG1    | -2.2183  | 4.98E-14 |
| CARHSP1  | -2.21738 | 9.53E-13 |
| MVK      | -2.20784 | 1.14E-10 |
| NCAPD3   | -2.20685 | 3.61E-12 |
| CHTF18   | -2.20653 | 1.14E-06 |
| ERCC6L   | -2.18754 | 1.57E-06 |
| ELOVL6   | -2.18449 | 2.27E-18 |
| E2F8     | -2.17816 | 1.59E-06 |
| C14orf1  | -2.17802 | 5.47E-40 |
| CEP152   | -2.17767 | 1.55E-08 |
| DEPDC1B  | -2.17401 | 5.99E-12 |
| FADS2    | -2.17099 | 8.23E-28 |
| FANCG    | -2.17023 | 9.03E-15 |
| SNRNP25  | -2.16775 | 9.30E-15 |
| GINS3    | -2.1669  | 1.02E-09 |
| ZWILCH   | -2.16388 | 7.77E-12 |

|                   |          |          |
|-------------------|----------|----------|
| <b>SASS6</b>      | -2.16294 | 4.60E-07 |
| <b>HMGCR</b>      | -2.16201 | 1.16E-25 |
| <b>CDKN2A</b>     | -2.15701 | 9.02E-19 |
| <b>AL035461.2</b> | -2.15104 | 2.51E-06 |
| <b>BARD1</b>      | -2.14603 | 2.43E-09 |
| <b>LMNB2</b>      | -2.14542 | 4.24E-07 |
| <b>CENPN</b>      | -2.13333 | 3.62E-07 |
| <b>NEIL3</b>      | -2.1233  | 3.85E-06 |
| <b>WDR90</b>      | -2.12281 | 2.00E-07 |
| <b>TMPO-AS1</b>   | -2.11629 | 2.35E-06 |
| <b>HES6</b>       | -2.10966 | 4.53E-07 |
| <b>TMPO</b>       | -2.10956 | 1.57E-18 |
| <b>ASRGL1</b>     | -2.10539 | 9.57E-10 |
| <b>DHCR24</b>     | -2.10312 | 2.07E-18 |
| <b>MYBL1</b>      | -2.09434 | 5.76E-06 |
| <b>MNS1</b>       | -2.09208 | 4.02E-06 |
| <b>LRP8</b>       | -2.09071 | 2.18E-11 |
| <b>RNASEH2A</b>   | -2.08831 | 1.66E-16 |
| <b>COQ2</b>       | -2.07647 | 4.06E-06 |
| <b>KMT5A</b>      | -2.07163 | 1.18E-07 |
| <b>HDGF</b>       | -2.06255 | 3.56E-21 |
| <b>WRAP53</b>     | -2.06092 | 1.84E-06 |
| <b>JSRP1</b>      | -2.06078 | 8.02E-13 |
| <b>TYMSOS</b>     | -2.05978 | 8.98E-06 |
| <b>INSIG1</b>     | -2.05965 | 1.40E-36 |
| <b>GEN1</b>       | -2.05916 | 2.23E-08 |
| <b>AC012073.1</b> | -2.05746 | 7.72E-06 |
| <b>CCDC18</b>     | -2.056   | 2.55E-06 |
| <b>ITGB3BP</b>    | -2.05338 | 3.36E-08 |
| <b>FADS1</b>      | -2.05278 | 2.41E-40 |
| <b>ARHGAP11B</b>  | -2.04075 | 2.77E-06 |
| <b>THOC3</b>      | -2.02729 | 7.19E-13 |
| <b>LRR1</b>       | -2.02477 | 1.72E-12 |
| <b>ECT2</b>       | -2.01766 | 1.23E-05 |
| <b>RAD18</b>      | -2.00499 | 3.24E-06 |
| <b>CENPH</b>      | -2.0046  | 3.84E-08 |
| <b>C9orf40</b>    | -2.00167 | 1.59E-06 |
